# Supplementary material
Source: PubMed Central journal article supplement (PMC6912855)

### Local Failure

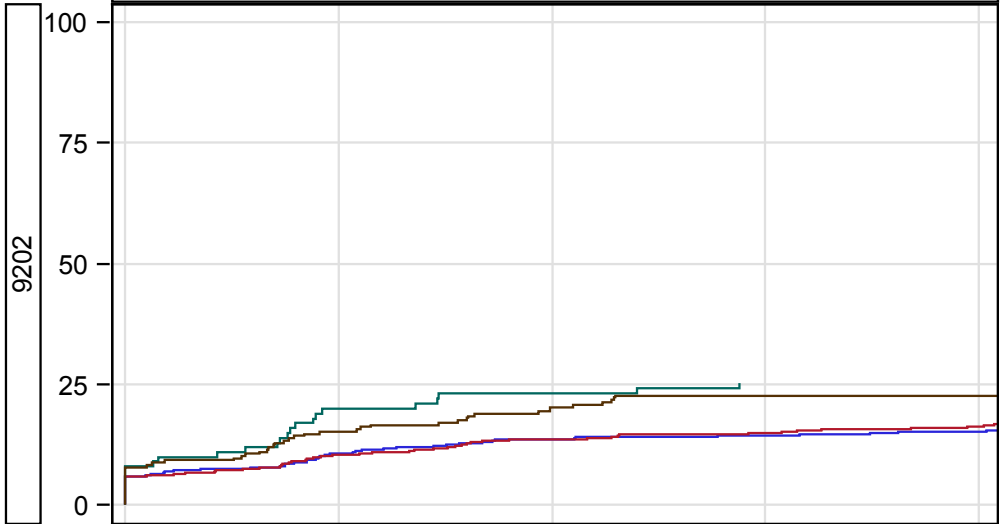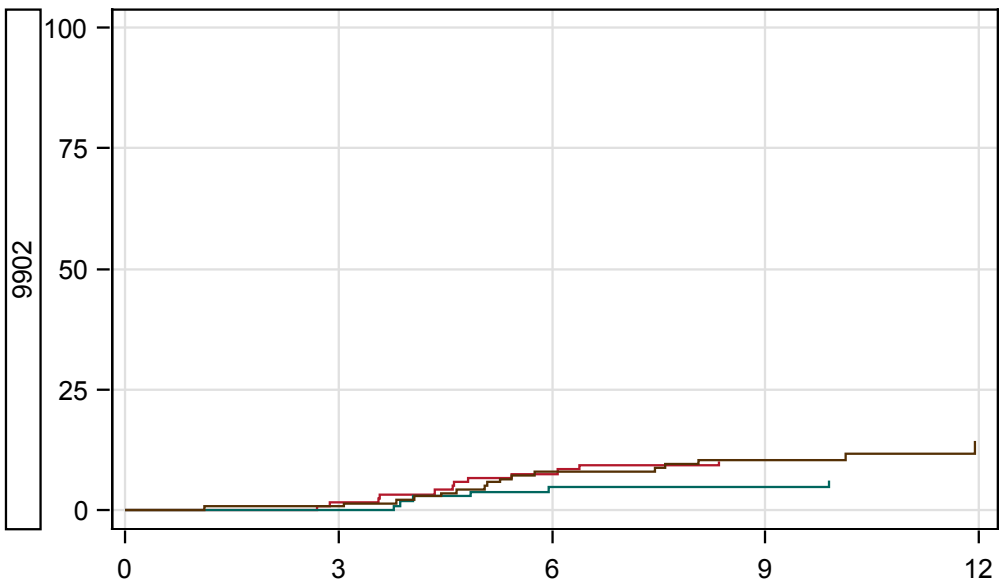

Time Since Randomization (Years)

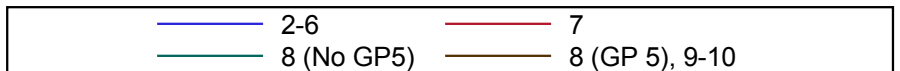

Supplement: NIHMS1543079-supplement-1.pdf [file NIHMS1543079-supplement-1.pdf]
